# Supplementary material
Source: publisher site journal article supplement (https://www.dovepress.com/get_supplementary_file.php?f=423221.docx)
Supplement: Supplementary file 1 [file get_supplementary_file.php]

**Supplementary materials**

**Table S1 Comparison of clinical characteristics among patients with different sPESI risk groups**

| **Variables** | **Total  (N = 145)** | **sPESI<1  (N = 26)** | **sPESI≥1 (N = 119)** | ***P*** |
| --- | --- | --- | --- | --- |
| Age, years | 62.2 ± 13.8 | 55.7 ± 14.8 | 63.6 ± 13.2 | 0.008 |
| Male, N (%) | 72 (49.7) | 12 (46.2) | 60 (50.4) | 0.693 |
| BMI, kg/m2 | 26.0 ± 3.7 | 25.3 ± 3.1 | 26.2 ± 3.9 | 0.263 |
| Smoking, n (%) | 47 (32.4) | 5 (19.2) | 42 (35.3) | 0.113 |
| SBP, mmHg | 111.6 ± 15.1 | 120.3 ± 12.4 | 109.7 ± 15.0 | 0.001 |
| Heart rate, bpm | 104.6 ± 12.9 | 89.9 ± 8.5 | 107.8 ± 11.4 | < 0.001 |
| History of VTE, n (%) | 28 (19.3) | 5 (19.2) | 23 (19.3) | 0.991 |
| History of cancer, n (%) | 1 (0.7) | 0 (0) | 1 (0.8) | 0.989 |
| OACs, n (%) | 136 (93.8) | 21 (80.8) | 115 (96.6) | 0.010 |
| **Comorbid conditions, n (%)** |  |  |  |  |
| Atrial fibrillation | 19 (13.1) | 3 (11.5) | 16 (13.4) | 0.982 |
| Hypertension | 73 (50.3) | 7 (26.9) | 66 (55.5) | 0.008 |
| Diabetes mellitus | 37 (25.5) | 2 (7.7) | 35 (29.4) | 0.021 |
| Hyperlipidemia | 62 (42.8) | 6 (23.1) | 56 (47.1) | 0.025 |
| CAD, n (%) | 50 (34.5) | 0 (0) | 50 (42) | <0.001 |
| **Laboratory test** |  |  |  |  |
| D-dimers, mg/L | 1.5 (0.5, 4.1) | 1.4 (0.5, 4.1) | 1.6 (0.5, 2.2) | 0.867 |
| Troponin, ng/mL | 0.1 (0.0, 0.2) | 0.0 (0.0, 0.1) | 0.2 (0.1, 0.3) | 0.036 |
| CKMB, ng/mL | 1.1 (0.6, 1.7) | 1.1 (0.6, 1.7) | 1.3 (0.6, 1.8) | 0.552 |
| NTproBNP, pg/mL | 226.0 (75.9, 1105.0) | 111.0 (56.5, 540.8) | 325.0 (87.6, 1184.3) | 0.039 |
| **Echocardiographic data** |  |  |  |  |
| Left atrium, mm | 37.1 ± 6.0 | 36.5 ± 7.8 | 37.2 ± 5.5 | 0.577 |
| LVEDD, mm | 46.0 ± 5.9 | 44.3 ± 7.2 | 46.4 ± 5.6 | 0.109 |
| Right ventricle, mm | 28.0 ± 5.5 | 28.9 ± 6.8 | 27.8 ± 5.2 | 0.339 |
| LVEF, % | 63.0 ± 7.0 | 65.1 ± 5.3 | 62.6 ± 7.2 | 0.094 |
| PASP, mmHg | 40.0 ± 23.1 | 44.7 ± 27.5 | 39.0 ± 22.1 | 0.252 |

Values are presented as mean ± standard deviation (SD), median (interquartile range) or as number (percentage). Abbreviations: BMI, body mass index; CAD, coronary artery disease; CKMB, creatine phosphokinase-MB; LVEDD, left ventricular end-diastolic diameter; LVEF, left ventricular ejection fraction; NTproBNP, N-terminal pro-B natriuretic peptide; OAC, oral anticoagulants; PASP, pulmonary arterial systolic pressure; SBP, systolic blood pressure; sPESI, simplified pulmonary severity index; VTE, venous thromboembolism.

**Table S2 Comparison of sleep parameters among patients with different sPESI risk groups**

| **Variables** | **Total (N = 145)** | | **sPESI<1 (N = 26)** | | | **sPESI≥1 (N = 119)** | ***P*** | |
| --- | --- | --- | --- | --- | --- | --- | --- | --- |
| AHI, events/h | 8.0 (2.5, 17.0) | | 2.4 (1.0, 10.0) | | | 9.0 (3.7, 19.0) | < 0.001 | |
| OSA, N (%) | 94 (64.8) | | 10 (38.5) | | | 84 (70.6) | 0.002 | |
| OAI, events/h | 3.0 (0.8, 9.0) | | 1.4 (0.3, 5.0) | | | 3.6 (0.9, 9.8) | 0.008 | |
| OHI, events/h | 4.1 (0.8, 9.0) | | 1.1 (0.3, 4.6) | | | 4.8 (1.3, 9.5) | 0.003 | |
| LAD, s | 35.0 (20.0, 54.0) | | 29.5 (17.2, 52.2) | | | 38.0 (22.0, 60.5) | 0.252 | |
| LHD, s | 73.0 (48.0, 99.0) | | 61.0 (23.8, 102.2) | | | 79.0 (50.5, 98.5) | 0.264 | |
| MAD, s | 18.1 (14.1, 24.6) | | 18.0 (13.9, 23.1) | | | 18.1 (14.1, 24.9) | 0.597 | |
| MHD, s | 30.5 (24.7, 37.5) | | 28.1 (20.9, 38.3) | | | 30.6 (25.5, 37.3) | 0.242 | |
| ODI, events/h | 7.8 (3.1, 18.1) | | 3.5 (1.2, 9.3) | | | 9.5 (3.8, 21.0) | 0.001 | |
| minSpO2, % | 84.2 ± 7.3 | | 87.5 ± 5.7 | | | 83.4 ± 7.4 | 0.009 | |
| Mean SpO2, % | 93.8 ± 3.8 | | 94.8 ± 3.3 | | | 93.6 ± 3.9 | 0.141 | |
| T90, % | 1.0 (0.0, 7.1) | | 0.0 (0.0, 1.8) | | | 1.4 (0.1, 9.8) | 0.011 | |
| MeanHR, bpm | 64.6 ± 11.5 | | 57.7 ± 5.6 | | | 66.1 ± 12.0 | < 0.001 | |
| MinHR, bpm | 52.1 ± 10.5 | | 47.9 ± 6.5 | | | 53.0 ± 11.0 | 0.024 | |
| MaxHR, bpm | 84.3 ± 12.7 | | 73.7 ± 6.4 | | | 86.7 ± 12.5 | < 0.001 | |
| ESS, points | | 2.0 (1.0, 4.0) | | 1.5 (1.0, 3.0) | 2.0 (1.0, 4.5) | | | 0.060 |

Values are presented as mean ± standard deviation (SD), median (interquartile range) or as number (percentage). AHI, apnea-hypopnea index; ESS, Epworth sleepiness scale; LAD, longest apnea duration; LHD, longest hypopnea duration; MAD, mean apnea duration; MaxHR, maximal heart rate; MHD, mean hypopnea duration; MinHR, minimal heart rate; minSpO2, minimal oxygen saturation; OAI, obstructive apnea index; ODI, 3% oxygen desaturation index; OHI, obstructive hypopnea index; OSA, obstructive sleep apnea; sPESI, simplified pulmonary severity index; SpO2, oxygen saturation by pulse oximetry; T90 ,the percentage of cumulative time with SpO2 below 90% in total recorded time.

**Table S3 Univariable logistic regression analysis for the sPESI≥1 group**

| **Variable** | **OR (95% CI)** | **P value** |
| --- | --- | --- |
| Age | 1.04 (1.01-1.07) | 0.010 |
| Male | 1.19 (0.51-2.78) | 0.694 |
| BMI | 1.07 (0.95-1.20) | 0.262 |
| Smoking | 1.28 (0.58-2.79) | 0.541 |
| ESS | 1.02 (0.90-1.15) | 0.736 |
| History of VTE | 1.01 (0.34-2.95) | 0.991 |
| Atrial fibrillation | 1.19 (0.32-4.43) | 0.794 |
| Hypertension | 3.38 (1.32-8.64) | 0.011 |
| Diabetes mellitus | 5.00 (1.12-22.31) | 0.035 |
| Hyperlipidemia | 2.96 (1.11-7.90) | 0.030 |
| CAD | 1.63 (0.76-3.48) | 0.208 |
| D-dimers | 1.01 (0.9-1.13) | 0.862 |
| Troponin | 1.00 (1.00-1.01) | 0.582 |
| CKMB | 1.07 (0.91-1.26) | 0.427 |
| NT-proBNP | 1.00 (1.00-1.01) | 0.119 |
| Left atrium | 1.02 (0.95-1.10) | 0.575 |
| LVEDD | 1.07 (0.99-1.15) | 0.109 |
| Right ventricle | 0.97 (0.90-1.04) | 0.339 |
| LVEF | 0.93 (0.86-1.01) | 0.092 |
| PASP | 0.99 (0.97-1.01) | 0.253 |

Abbreviations: BMI, body mass index; CAD, coronary artery disease; CI, confidence interval; CKMB, creatine phosphokinase-MB; ESS, Epworth sleepiness scale; LVEDD, left ventricular end-diastolic diameter; LVEF, left ventricular ejection fraction; NT-proBNP, N-terminal pro-B natriuretic peptide; OACs, oral anticoagulants; OR, odds ratio; PASP, pulmonary arterial systolic pressure; sPESI, simplified pulmonary severity index; VTE, venous thromboembolism.

**Table S4 Univariable proportional Cox regression analysis for long-term adverse outcomes in patients with APE**

| **Variables** | **HR (95%CI)** | ***P*** |
| --- | --- | --- |
| Age | 1.01 (0.98-1.03) | 0.725 |
| Male | 2.14 (0.96-4.77) | 0.062 |
| BMI | 1.07 (0.96-1.18) | 0.231 |
| Smoking | 1.28 (0.58-2.79) | 0.541 |
| SBP | 0.92 (0.88-0.95) | < 0.001 |
| Heart rate | 1.01 (0.98-1.03) | 0.722 |
| ESS | 1.02 (0.90-1.15) | 0.740 |
| History of VTE | 1.31 (0.07-1.33) | 0.116 |
| History of Cancer | 11.43 (1.49-87.9) | 0.019 |
| OACs | 0.80 (0.24-1.27) | 0.564 |
| **sPESI** | **2.61 (1.58-4.33)** | **< 0.001** |
| Atrial fibrillation | 1.28 (0.44-3.70) | 0.650 |
| Hypertension | 1.50 (0.70-3.24) | 0.298 |
| Diabetes mellitus | 1.25 (0.55-2.85) | 0.601 |
| Hyperlipidemia | 0.85 (0.39-1.83) | 0.678 |
| CAD | 1.63 (0.76-3.48) | 0.208 |
| D-dimer | 1.00 (0.91-1.11) | 0.935 |
| Troponin | 0.55 (0.05-5.93) | 0.623 |
| CKMB | 1.04 (0.97-1.11) | 0.256 |
| NT-proBNP | 1.00 (1.00-1.00) | 0.649 |
| Left atrium | 1.05 (0.99-1.11) | 0.136 |
| LVEDD | 0.99 (0.94-1.06) | 0.954 |
| Right ventricle | 1.04 (0.97-1.10) | 0.258 |
| LVEF | 0.96 (0.92-1.01) | 0.118 |
| **PASP** | **1.02 (1.00-1.03)** | **0.020** |

Bold text indicates statistically significant factors for adverse events included in the subsequent multivariable Cox regression analysis. Note that SBP and history of cancer, although statistically significant, are part of the evaluated indices in the sPESI scoring system and thus not included in the multivariable Cox regression analysis. Abbreviations: BMI, body mass index; CAD, coronary artery disease; CI, confidence interval; CKMB, creatine phosphokinase-MB; ESS, Epworth sleepiness scale; HR, hazard ratio; LVEDD, left ventricular end-diastolic diameter; LVEF, left ventricular ejection fraction; NTproBNP, N-terminal pro-B natriuretic peptide; OAC, oral anticoagulants; PASP, pulmonary arterial systolic pressure; SBP, systolic blood pressure; sPESI, simplified pulmonary severity index; VTE, venous thromboembolism.
